# Supplementary material for: Assessing the Movements, Habitat Use, and Site Fidelity of the Giant Freshwater Whipray (Urogymnus polylepis) with Acoustic Telemetry in the Maeklong River, Thailand
Source: MDPI journal article supplement (doi:10.3390/w15132311), 2023-06-21

Supplemental Material  
to  
**Assessing the Movements, Habitat Use, and Site Fidelity of the Giant Freshwater Stingray (*Urogymnus polylepis*) with Acoustic Telemetry in the MaeKlong River, Thailand**

Thanida Haetrakul, Teresa Campbell, Chayanis Daochai, Nitiwadee Keschumras, Tanatchaporn Tantiveerakul, Zeb Hogan, and Nantarika Chansue

**Table S1.** Results of Student's T-test analyses of whipray body size as a function of sex and maturity. Means are reported in meters. Measurement: TL = total length, GL = girdle length, DW = disc width. Sample sizes: f = female, m = male. Asterisks indicate significance at the  $\alpha < 0.05$  level.

| Measurement     | Female Mean | Male Mean | t value | df     | p value | Sample Sizes |
|-----------------|-------------|-----------|---------|--------|---------|--------------|
| <b>Immature</b> |             |           |         |        |         |              |
| TL              | 2.085       | 1.975     | 0.3365  | 4.4530 | 0.7517  | f = 6, m = 4 |
| GL              | 0.795       | 0.845     | -0.7288 | 7.9814 | 0.4870  | f = 6, m = 4 |
| DW              | 0.870       | 0.868     | 0.0338  | 7.8222 | 0.9739  | f = 6, m = 4 |
| <b>Mature</b>   |             |           |         |        |         |              |
| TL              | 3.518       | 2.810     | 2.8660  | 6.2677 | 0.0272* | f = 6, m = 6 |
| GL              | 1.610       | 1.097     | 3.5308  | 5.8449 | 0.0129* | f = 6, m = 6 |
| DW              | 1.745       | 1.187     | 3.7099  | 5.599  | 0.0113* | f = 6, m = 6 |

**Table S2.** Summary statistics of whipray body size grouped by maturity and sex. All measurements are reported in meters. Measurement: TL = total length, GL = girdle length, DW = disc width. Sex: F = female, M = male. Sample sizes are reported in Table S1.

| Measurement     | Sex | Min  | Mean (SD)   | Max  |
|-----------------|-----|------|-------------|------|
| <b>Immature</b> |     |      |             |      |
| TL              | F   | 1.51 | 2.08 (0.35) | 2.48 |
|                 | M   | 1.10 | 1.98 (0.59) | 2.36 |
| GL              | F   | 0.63 | 0.80 (0.13) | 0.94 |
|                 | M   | 0.72 | 0.85 (0.09) | 0.92 |
| DW              | F   | 0.72 | 0.87 (0.14) | 1.02 |
|                 | M   | 0.77 | 0.87 (0.10) | 0.98 |
| <b>Mature</b>   |     |      |             |      |
| TL              | F   | 2.82 | 3.52 (0.57) | 4.14 |
|                 | M   | 2.65 | 2.81 (0.21) | 3.18 |
| GL              | F   | 1.00 | 1.61 (0.34) | 2.0  |
|                 | M   | 0.99 | 1.10 (0.10) | 1.26 |
| DW              | F   | 1.10 | 1.74 (0.36) | 2.06 |
|                 | M   | 1.07 | 1.19 (0.09) | 1.31 |

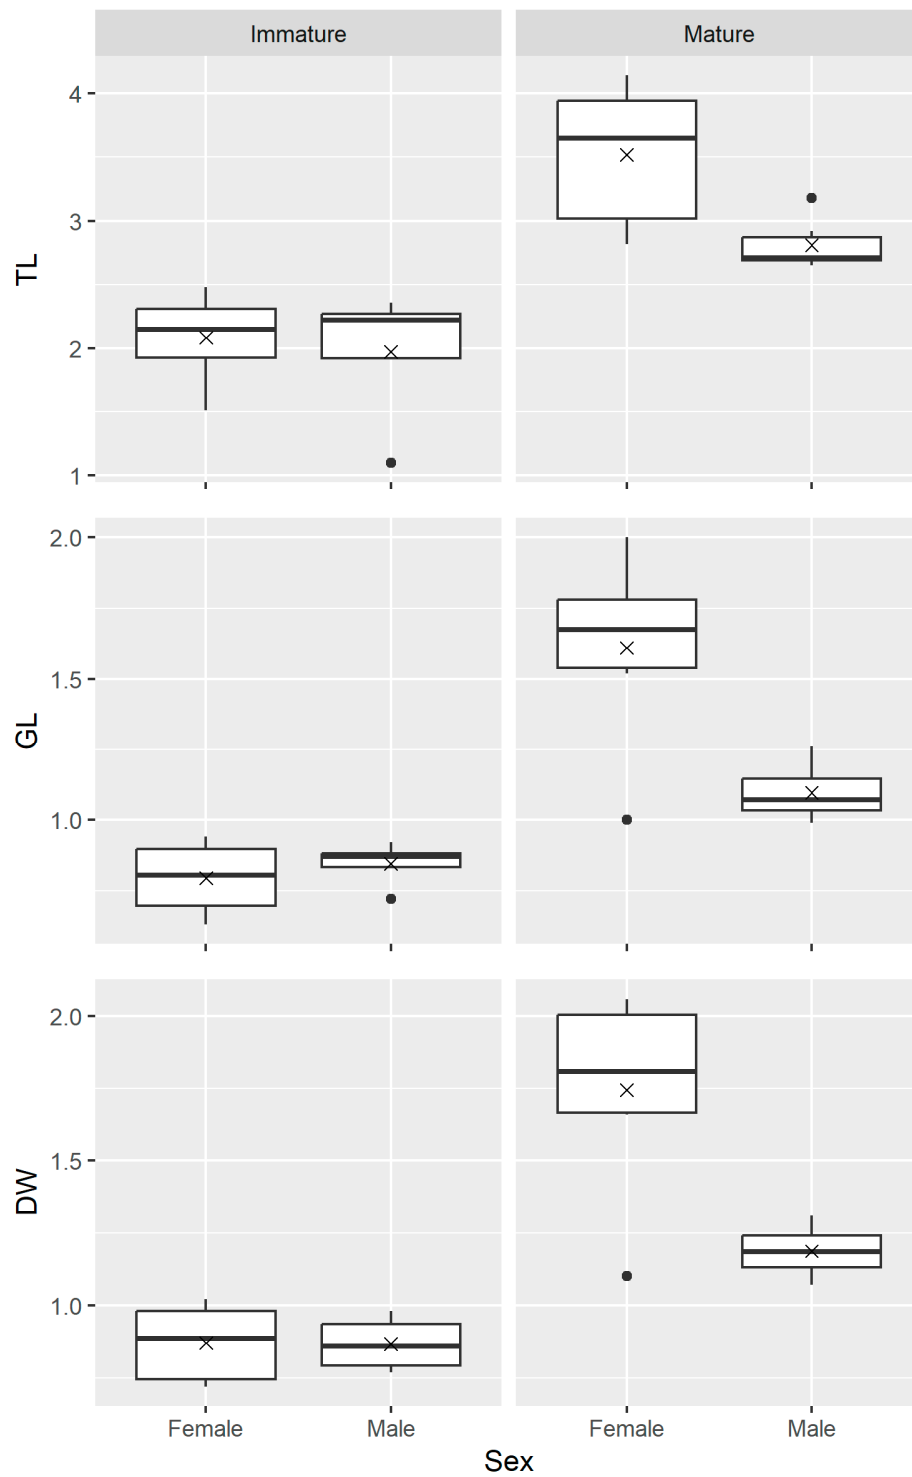

**Figure S1.** Box plots of whipray body size as a function of sex and maturity. Note different y-axis scales for TL (total length), GL (girdle length), and DW (disc width). All measurements are in meters. Sample sizes are reported in Table S1. X's represent the mean of the data and dark horizontal bars represent the median. White shaded areas show the middle 50% of the data, while vertical bars show the lower and upper 25%. Black dots represent outliers.

**Table S3.** Summary of receiver detection results. Receiver days are the number of days between deployment and the study end date, 13 February 2019. Receiver detection days is the number of days the receiver detected tags. Total events and cumulative and average event duration refer to presence events (see methods). Detection index = fish detection days / fish days  $\times$  100. Detection index and average event duration are independent of the amount of time the receiver was deployed.

| Receiver                 | Receiver Days | Receiver Detection Days | Total Detections | Total Events | Cumulative Event Duration (h:mm:ss) | Fish Days | Fish Detection Days | Detection Index | Avg Event Duration (h:mm:ss) |
|--------------------------|---------------|-------------------------|------------------|--------------|-------------------------------------|-----------|---------------------|-----------------|------------------------------|
| 1. Estuary               | 332           | 142                     | 4093             | 470          | 385:22:36                           | 6026      | 290                 | 4.81            | 0:49:12                      |
| 2. Mussel Pier           | 332           | 160                     | 4490             | 524          | 326:33:00                           | 6026      | 321                 | 5.33            | 0:37:23                      |
| 3. Marine Department     | 332           | 199                     | 3911             | 601          | 328:48:32                           | 6026      | 338                 | 5.61            | 0:32:50                      |
| 4. Baan Tai Had resort   | 332           | 183                     | 4499             | 521          | 402:49:50                           | 6026      | 341                 | 5.66            | 0:46:23                      |
| 5. Wat Tai Had           | 332           | 228                     | 8316             | 953          | 642:35:30                           | 6026      | 495                 | 8.21            | 0:40:27                      |
| 6. Chaosamran restaurant | 332           | 194                     | 13731            | 496          | 606:30:29                           | 6026      | 312                 | 5.18            | 1:13:22                      |
| 7. Wat Bang Khae Noi     | 316           | 219                     | 18639            | 640          | 915:22:52                           | 5969      | 295                 | 4.94            | 1:25:49                      |
| 8. Wat Bang Kung         | 205           | 116                     | 9258             | 304          | 532:49:31                           | 4510      | 168                 | 3.73            | 1:45:10                      |

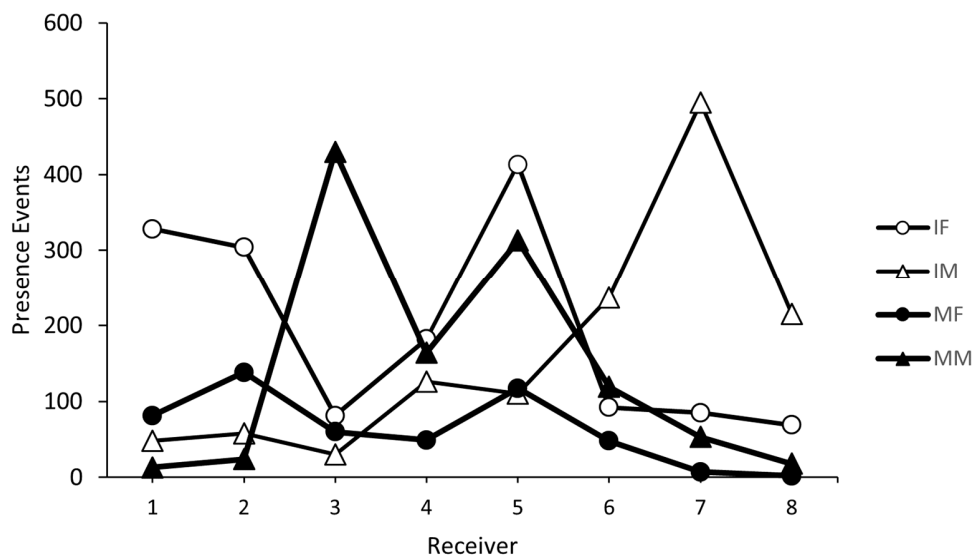

**Figure S2.** Total presence events by receiver for each life-history group. IF = immature female, IM = immature male, MF = mature female, MM = mature male.

**Table S4.** Receiver presence events by month for each life-history group.

| <b>Immature</b>              | <b>April</b> | <b>May</b> | <b>June</b> | <b>July</b> | <b>Aug</b> | <b>Sep</b> | <b>Oct</b> | <b>Nov</b> | <b>Dec</b> | <b>Jan</b> | <b>Feb</b> | <b>Total</b> |
|------------------------------|--------------|------------|-------------|-------------|------------|------------|------------|------------|------------|------------|------------|--------------|
| <b>Female</b>                |              |            |             |             |            |            |            |            |            |            |            |              |
| 1. Estuary                   |              |            | 3           | 8           | 99         | 79         | 78         | 28         | 16         | 12         | 5          | <b>328</b>   |
| 2. Mussel Pier               |              |            | 2           | 24          | 83         | 35         | 103        | 36         | 12         | 8          | 1          | <b>304</b>   |
| 3. Marine Department         |              |            | 8           | 10          | 33         | 9          | 14         | 4          |            | 2          | 1          | <b>81</b>    |
| 4. Baan Tai Had Resort       |              | 1          | 23          | 71          | 19         | 2          | 12         | 20         | 24         | 10         |            | <b>182</b>   |
| 5. Wat Tai Had               |              | 13         | 20          | 58          | 39         | 18         | 59         | 78         | 57         | 61         | 10         | <b>413</b>   |
| 6. Chaosamran restaurant     |              | 4          |             | 7           | 14         | 2          | 6          | 7          | 16         | 36         |            | <b>92</b>    |
| 7. Wat Bang Khae Noi         |              | 4          |             | 12          | 19         | 4          | 2          | 9          | 4          | 31         |            | <b>85</b>    |
| 8. Wat Bang Kung             |              |            |             | 8           | 20         | 4          | 4          | 7          | 4          | 22         |            | <b>69</b>    |
| <b>Female total events</b>   |              | 22         | 56          | 198         | 326        | 153        | 278        | 189        | 133        | 182        | 17         | <b>1554</b>  |
| <b>Male</b>                  |              |            |             |             |            |            |            |            |            |            |            |              |
| 1. Estuary                   |              |            |             |             | 18         | 27         |            | 1          | 1          | 1          |            | <b>48</b>    |
| 2. Mussel Pier               | 2            |            |             | 2           | 32         | 17         | 3          | 1          | 1          |            |            | <b>58</b>    |
| 3. Marine Department         |              |            |             | 2           | 20         | 8          |            |            |            |            |            | <b>30</b>    |
| 4. Baan Tai Had Resort       | 1            |            | 17          | 30          | 9          | 13         | 47         | 4          | 3          | 2          |            | <b>126</b>   |
| 5. Wat Tai Had               | 33           | 1          | 6           | 23          | 10         | 6          | 11         | 8          | 2          | 9          | 1          | <b>110</b>   |
| 6. Chaosamran restaurant     | 28           | 16         | 12          | 19          | 22         | 11         | 54         | 25         | 38         | 10         | 2          | <b>237</b>   |
| 7. Wat Bang Khae Noi         | 42           | 86         | 83          | 50          | 17         | 4          | 39         | 72         | 73         | 21         | 8          | <b>495</b>   |
| 8. Wat Bang Kung             |              |            |             | 2           | 1          |            | 27         | 75         | 82         | 26         | 2          | <b>215</b>   |
| <b>Male total events</b>     | 106          | 103        | 118         | 128         | 129        | 86         | 181        | 186        | 200        | 69         | 13         | <b>1319</b>  |
| <b>Immature total events</b> | <b>106</b>   | <b>125</b> | <b>174</b>  | <b>326</b>  | <b>455</b> | <b>239</b> | <b>459</b> | <b>375</b> | <b>333</b> | <b>251</b> | <b>30</b>  | <b>2873</b>  |
| <b>Mature</b>                | <b>April</b> | <b>May</b> | <b>June</b> | <b>July</b> | <b>Aug</b> | <b>Sep</b> | <b>Oct</b> | <b>Nov</b> | <b>Dec</b> | <b>Jan</b> | <b>Feb</b> | <b>Total</b> |
| <b>Female</b>                |              |            |             |             |            |            |            |            |            |            |            |              |
| 1. Estuary                   |              |            |             | 1           | 33         | 31         | 15         | 1          |            |            |            | <b>81</b>    |
| 2. Mussel Pier               |              | 3          | 2           | 6           | 34         | 57         | 24         | 3          | 4          | 4          | 1          | <b>138</b>   |
| 3. Marine Department         |              | 7          | 8           | 4           | 13         | 2          | 18         | 3          | 1          |            | 4          | <b>60</b>    |
| 4. Baan Tai Had Resort       |              | 7          | 3           | 12          | 1          |            | 3          | 18         | 3          | 2          |            | <b>49</b>    |
| 5. Wat Tai Had               |              |            | 8           | 20          |            |            | 9          | 37         | 26         | 17         |            | <b>117</b>   |
| 6. Chaosamran restaurant     |              |            | 3           | 12          |            |            | 2          | 7          | 8          | 16         |            | <b>48</b>    |
| 7. Wat Bang Khae Noi         |              |            |             | 4           |            |            |            |            |            | 3          |            | <b>7</b>     |
| 8. Wat Bang Kung             |              |            |             |             |            |            |            |            |            | 2          |            | <b>2</b>     |
| <b>Female total events</b>   |              | 17         | 24          | 59          | 81         | 90         | 71         | 69         | 42         | 44         | 5          | <b>502</b>   |
| <b>Male</b>                  |              |            |             |             |            |            |            |            |            |            |            |              |
| 1. Estuary                   | 1            | 3          |             |             | 3          | 5          |            | 1          |            |            |            | <b>13</b>    |
| 2. Mussel Pier               | 1            | 10         |             | 1           | 1          | 3          | 2          | 6          |            |            |            | <b>24</b>    |
| 3. Marine Department         | 19           | 74         | 25          | 38          | 88         | 75         | 73         | 21         | 15         | 2          |            | <b>430</b>   |
| 4. Baan Tai Had Resort       | 8            | 6          | 10          | 32          | 13         | 1          | 14         | 36         | 27         | 17         |            | <b>164</b>   |
| 5. Wat Tai Had               |              | 3          | 29          | 38          | 4          |            | 13         | 69         | 91         | 66         |            | <b>313</b>   |
| 6. Chaosamran restaurant     |              |            | 11          | 13          |            |            | 6          | 16         | 24         | 49         |            | <b>119</b>   |
| 7. Wat Bang Khae Noi         | 2            |            | 11          |             |            |            | 2          | 3          | 5          | 30         |            | <b>53</b>    |
| 8. Wat Bang Kung             |              |            |             |             |            |            | 2          | 2          | 1          | 13         |            | <b>18</b>    |
| 1. Estuary                   | 31           | 96         | 86          | 122         | 109        | 84         | 112        | 154        | 163        | 177        |            | <b>1134</b>  |
| <b>Mature total events</b>   | <b>31</b>    | <b>113</b> | <b>110</b>  | <b>181</b>  | <b>190</b> | <b>174</b> | <b>183</b> | <b>223</b> | <b>205</b> | <b>221</b> | <b>5</b>   | <b>1636</b>  |

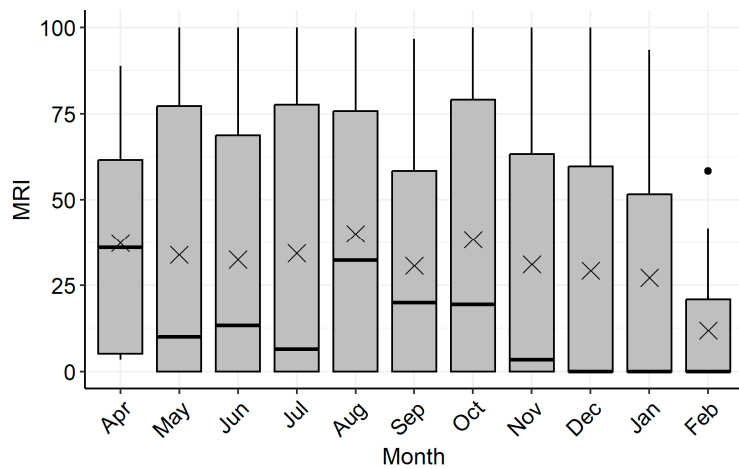

**Figure S3.** Boxplots showing the distribution of monthly residency index (MRI) data for tagged whiprays. X's represent the mean of the data and dark horizontal bars represent the median. Gray shaded areas show the middle 50% of the data, while vertical bars show the lower and upper 25%. Black dots represent outliers. Whiprays never detected by the array ( $n=3$ ) were not included. Sample size for July through February was  $n = 19$ . April, May, and June had reduced sample sizes ( $n = 7, 12$ , and  $18$ , respectively) because not all whiprays were tagged. March 2018 is not shown because three out of four tagged fish were never detected again, and the fourth had an MRI = 0.

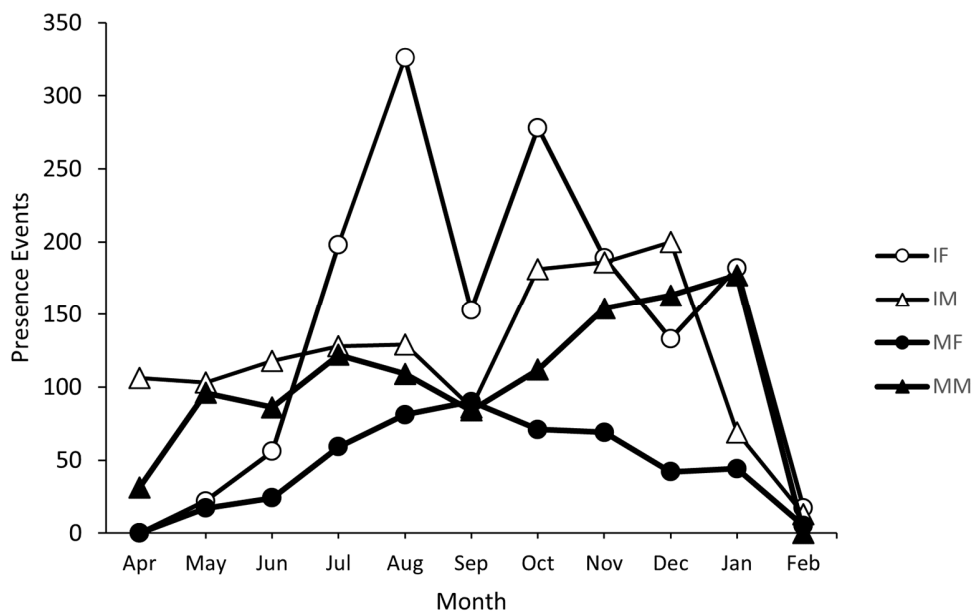

**Figure S4.** Total presence events by month for each life-history group. IF = immature female, IM = immature male, MF = mature female, MM = mature male. March 2018 is not shown because three out of four tagged fish were never detected again, and the fourth had an MRI = 0.

**Table S5.** Number of presence events during the day and night for all life-history groups. Day:Night is the ratio of the number of day events to the number of night events.

| Sex                 | Total Events |              | Day:Night   |                    |             |
|---------------------|--------------|--------------|-------------|--------------------|-------------|
|                     | Day          | Night        | Min         | Mean (SD)          | Max         |
| <b>Immature</b>     |              |              |             |                    |             |
| Female              | 740          | 814          | 0.50        | 0.75 (0.15)        | 0.88        |
| Male                | 622          | 697          | 0.00        | 0.63 (0.57)        | 1.26        |
| <i>Subtotal</i>     | <i>1,362</i> | <i>1,511</i> | <i>0.00</i> | <i>0.70 (0.37)</i> | <i>1.26</i> |
| <b>Mature</b>       |              |              |             |                    |             |
| Female              | 260          | 242          | 0.54        | 0.93 (0.28)        | 1.26        |
| Male                | 642          | 492          | 0.88        | 1.18 (0.31)        | 0.56        |
| <i>Subtotal</i>     | <i>902</i>   | <i>734</i>   | <i>0.54</i> | <i>1.04 (0.30)</i> | <i>1.56</i> |
| <b>Sex Subtotal</b> |              |              |             |                    |             |
| <i>Female</i>       | <i>1,000</i> | <i>1,056</i> | <i>0.50</i> | <i>0.84 (0.23)</i> | <i>1.26</i> |
| <i>Male</i>         | <i>1,264</i> | <i>1,189</i> | <i>0.00</i> | <i>0.91 (0.52)</i> | <i>1.56</i> |
| <b>Grand Total</b>  | <b>2,264</b> | <b>2,245</b> | <b>0</b>    | <b>0.87 (0.37)</b> | <b>1.56</b> |

**Table S6.** Results of Pearson's correlation tests for environmental correlates of residency index (RI). Tests analyzed the relationship between mean monthly environmental factors (temperature, salinity, and tide), and mean monthly residency indices (MRI).

| Environmental Correlate | MRI          | t     | df | R     | p    |
|-------------------------|--------------|-------|----|-------|------|
| Temperature             | MRI          | 0.35  | 9  | 0.12  | 0.73 |
|                         | Female MRI   | 0.24  | 8  | 0.08  | 0.82 |
|                         | Male MRI     | 0.80  | 9  | 0.26  | 0.45 |
|                         | Immature MRI | -0.91 | 9  | -0.29 | 0.39 |
|                         | Mature MRI   | 0.46  | 9  | 0.15  | 0.66 |
| Salinity                | MRI          | -0.20 | 9  | -0.07 | 0.84 |
|                         | Female MRI   | -0.87 | 8  | -0.29 | 0.41 |
|                         | Male MRI     | 0.71  | 9  | 0.23  | 0.49 |
|                         | Immature MRI | 0.34  | 9  | 0.11  | 0.74 |
|                         | Mature MRI   | -0.40 | 9  | -0.13 | 0.70 |
| Tide                    | MRI          | -1.52 | 9  | -0.45 | 0.16 |
|                         | Female MRI   | -2.30 | 8  | -0.63 | 0.05 |
|                         | Male MRI     | -0.50 | 9  | -0.16 | 0.63 |
|                         | Immature MRI | -0.10 | 9  | -0.03 | 0.92 |
|                         | Mature MRI   | -2.2  | 9  | -0.59 | 0.06 |

## Movement Plots of High-Use Whiprays

Immature Females

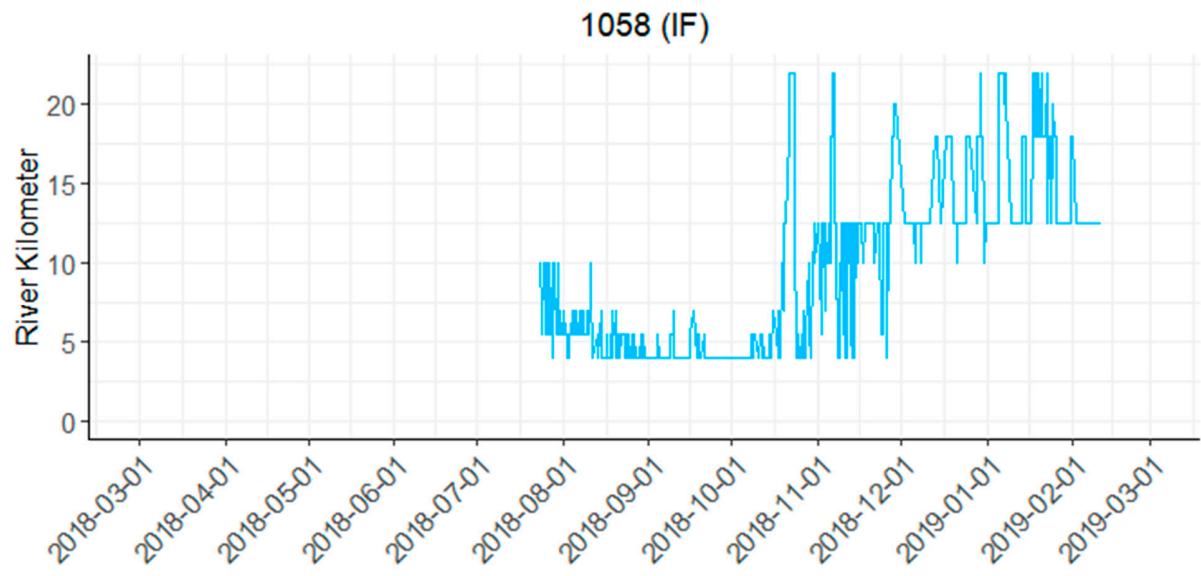

## Movement Plots of High-Use Whiprays

Immature Males

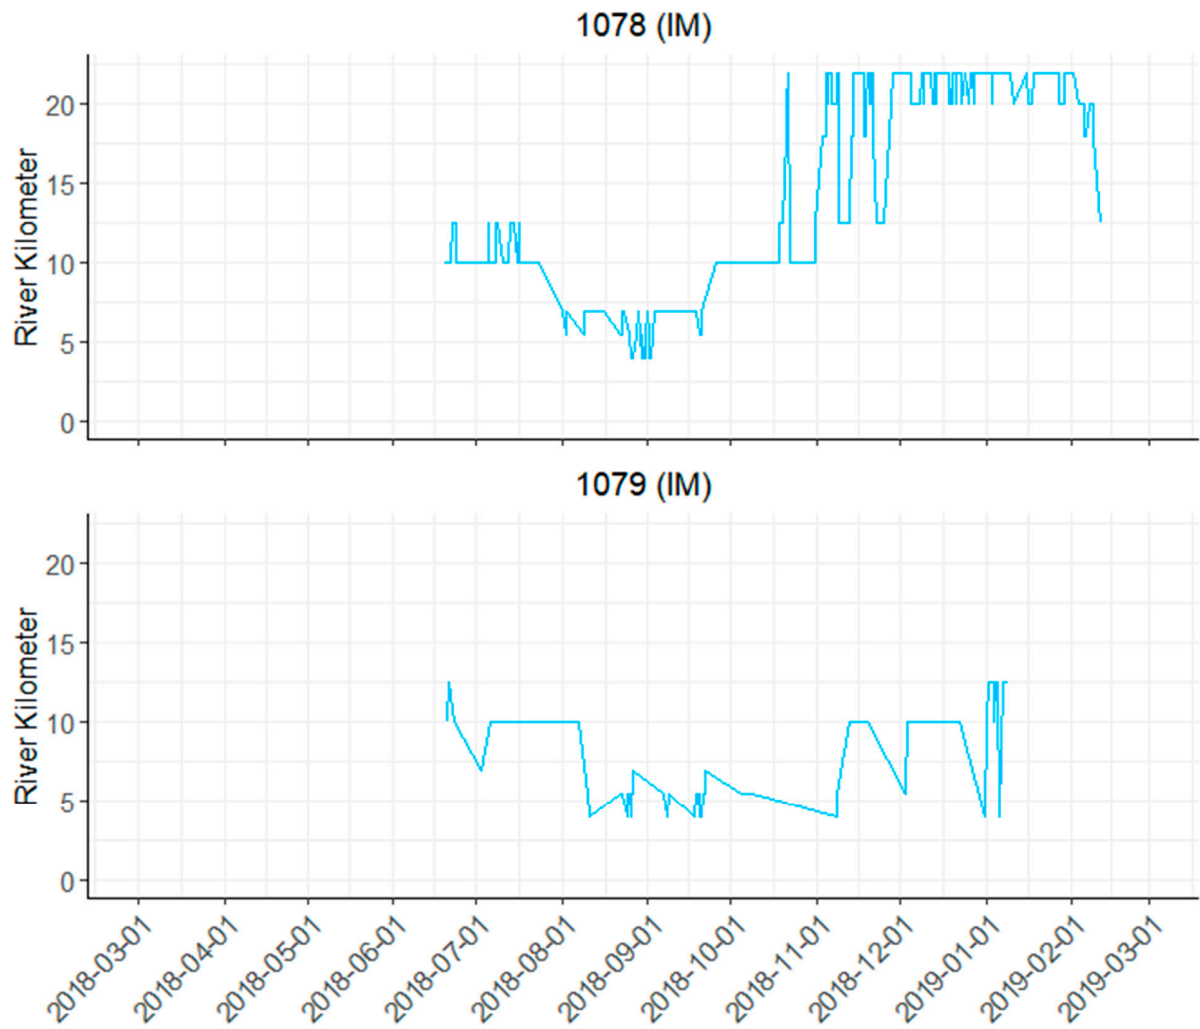



## Movement Plots of High-Use Whiprays

Mature Females

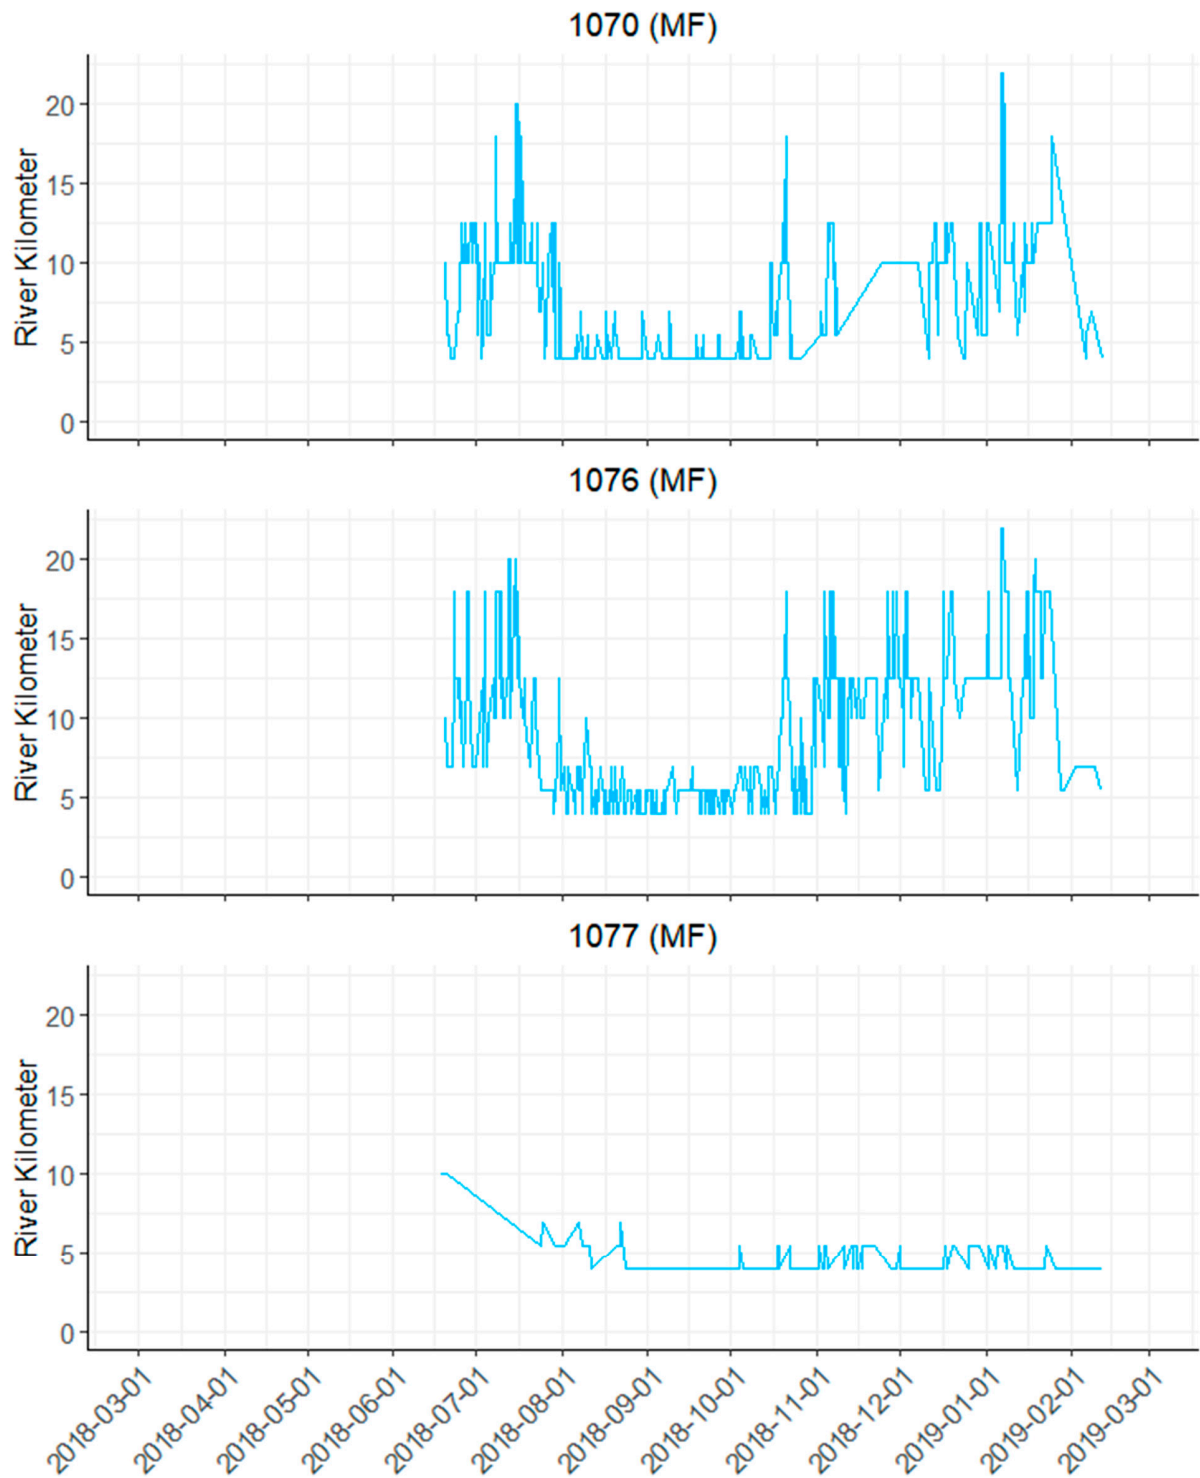

## Movement Plots of High-Use Whiprays

Mature Males

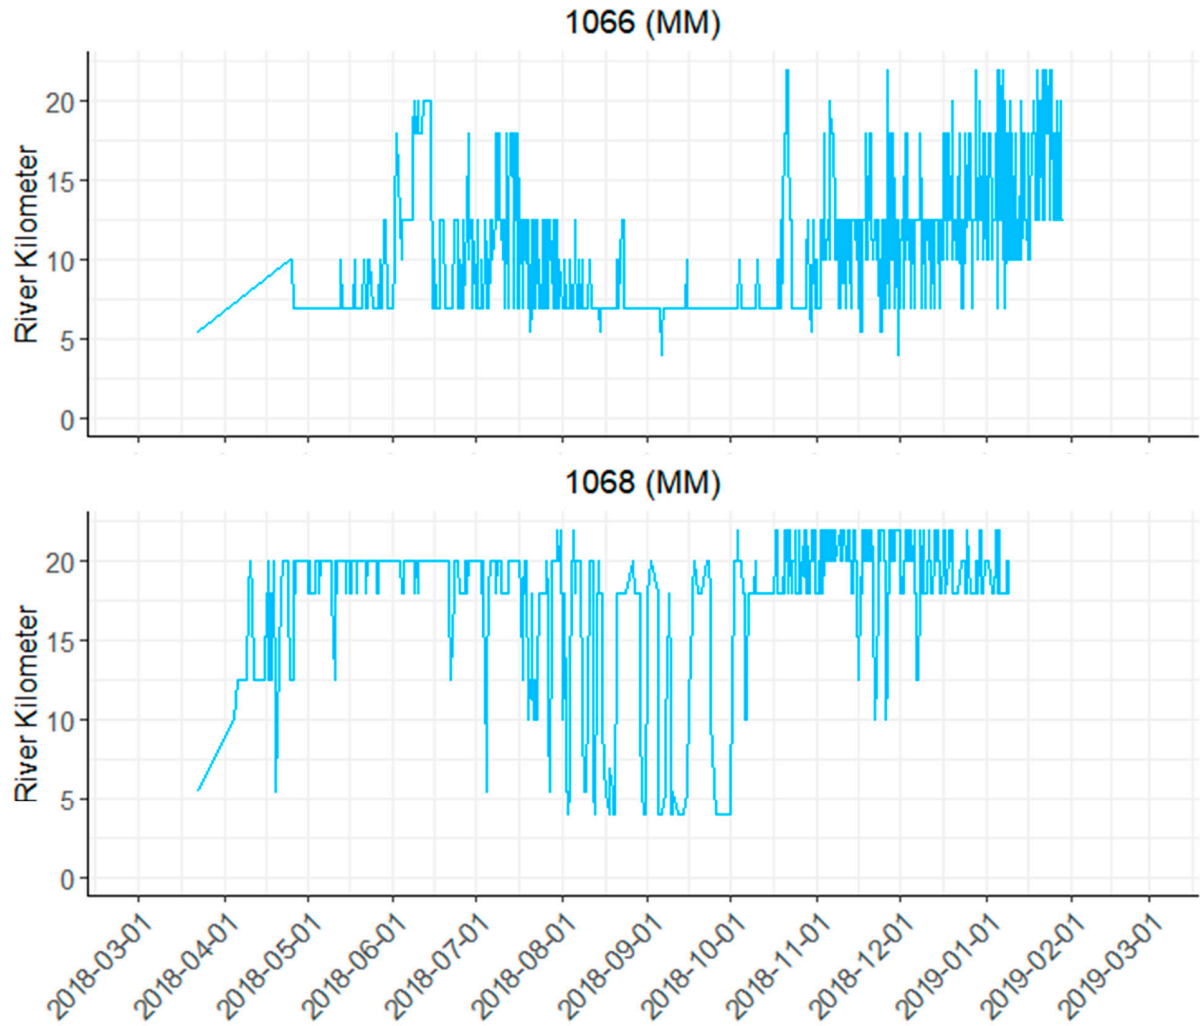

Supplement: s1 [file s1]
